# Supplementary material for: Potential Nematode Alarm Pheromone Induces Acute Avoidance in Caenorhabditis elegans
Source: Oxford University Press journal article supplement (doi:10.1534/genetics.116.197293), 2017-05-12
Supplement: files4.pdf [file files4.pdf]

## Supplementary Information

### Supplementary Videos

#### **Video S1. Drop assay - response to buffer**

Response of a wild-type *C. elegans* adult hermaphrodite to a drop of M9 buffer.

Video is also available at <https://youtu.be/IbDuQH3IdY>

#### **Video S2. Drop assay - response to worm extract**

Response of a wild-type *C. elegans* adult hermaphrodite to a drop of worm extract.

Video is also available at [https://youtu.be/AblreY\\_pbR0](https://youtu.be/AblreY_pbR0)

#### **Video S3. Trap assay**

Responses of wild-type *C. elegans* adult hermaphrodites to the worm extract and M9 buffer in the trap assay. Video is set at 5X speed. Red, worm extract; blue, buffer.

Video is also available at <https://youtu.be/34q1j2z9290>

## Supplementary Figures

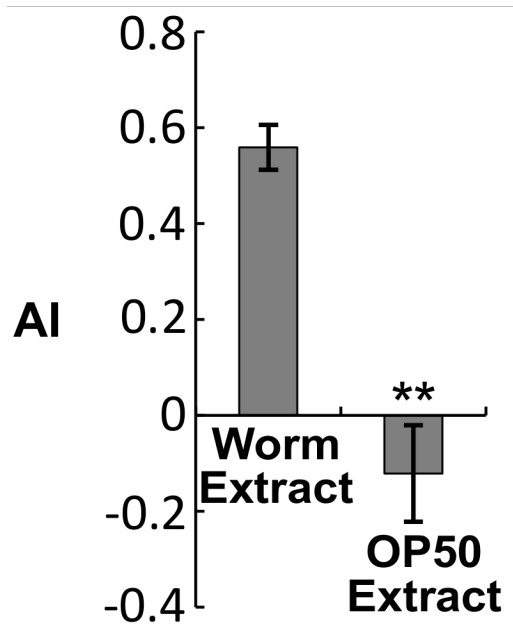

**Figure S1. Bacterial extract did not repel worms**

Both *E.coli* OP50 and *C. elegans* were washed, sonicated, and filtered similarly to obtain the extracts. *C. elegans* avoided the worm extract but not the bacteria extract in population assays. Bar and error bars indicate means and SEM, respectively. \*\*  $p < 0.01$ , Student's *t*-test.  $n \geq 9$ .

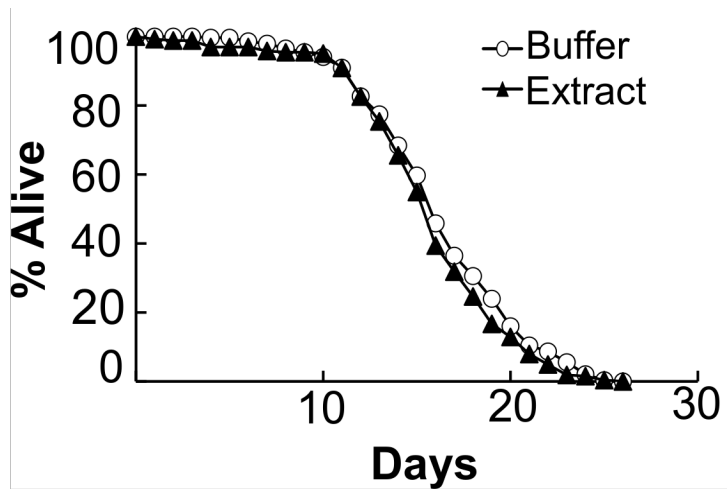

**Figure S2. Repeatedly dosing worms with worm extract did not reduce their lifespan.**

An independent trial confirming the results in Fig. 2A.

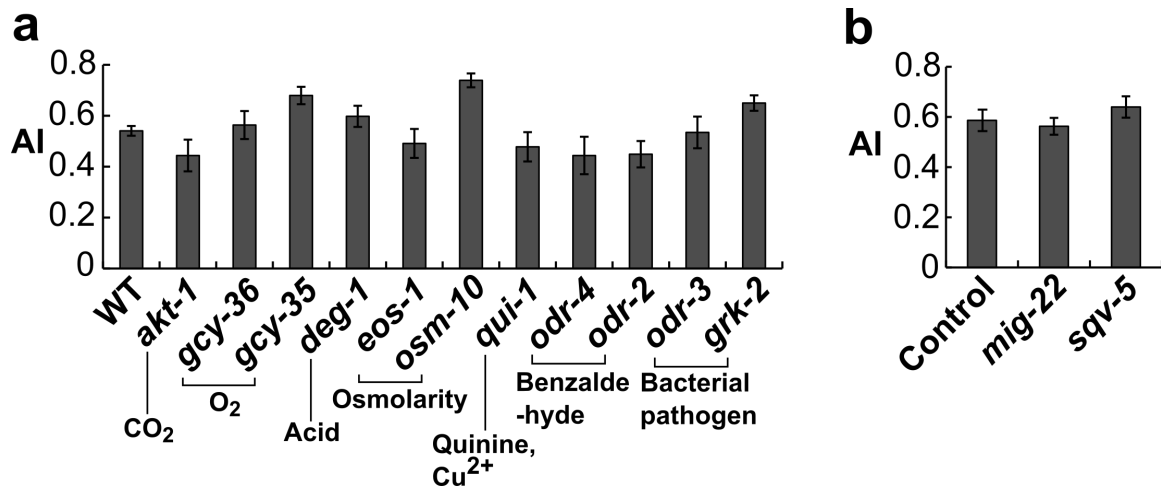

**Figure S3. Alarm pheromone is a novel nematode repellent.**

**a.** Mutants with defects in avoiding CO<sub>2</sub>, O<sub>2</sub>, acids, osmolarity, quinine, Cu<sup>2+</sup>, benzaldehyde, or bacterial pathogen (Bargmann *et al.* 1993; Hart *et al.* 1999; Bargmann 2006; Bretscher *et al.* 2008; Wang *et al.* 2008), still avoided the worm extract. n ≥ 10.

**b.** Extracts from worms with reduced GAG production still elicited similar level of avoidance as wild type. n ≥ 20.

### Supplementary References

- Bargmann C. I., Hartwig E., Horvitz H. R., 1993 Odorant-selective genes and neurons mediate olfaction in *C. elegans*. *Cell* **74**: 515–527.
- Bargmann C., 2006 Chemosensation in *C. elegans*. *WormBook*.
- Bretscher A. J., Busch K. E., Bono M. de, 2008 A carbon dioxide avoidance behavior is integrated with responses to ambient oxygen and food in *Caenorhabditis elegans*. *Proc. Natl. Acad. Sci.* **105**: 8044–8049.
- Hart A. C., Kass J., Shapiro J. E., Kaplan J. M., 1999 Distinct Signaling Pathways Mediate Touch and Osmosensory Responses in a Polymodal Sensory Neuron. *J. Neurosci.* **19**: 1952–1958.
- Wang Y., Apicella A., Lee S.-K., Ezcurra M., Slone R. D., Goldmit M., Schafer W. R., Shaham S., Driscoll M., Bianchi L., 2008 A glial DEG/ENaC channel functions with neuronal channel DEG-1 to mediate specific sensory functions in *C. elegans*. *EMBO J.* **27**: 2388–2399.

**Table S1. Strains used in the study.**

| <b>Strain ID</b> | <b>Genotype</b>                     |
|------------------|-------------------------------------|
| VC1785           | <i>acox-1(ok2257) I</i>             |
| BQ1              | <i>akt-1(mg306) V</i>               |
| CB1112           | <i>cat-2(e1112) II</i>              |
| CB3329           | <i>che-10(e1809) II</i>             |
| DR47             | <i>daf-11(m47) V</i>                |
| RB859            | <i>daf-22(ok693) II</i>             |
| DR476            | <i>daf-22(m130) II</i>              |
| IE3058           | <i>daf-37 (ttTi3058) II</i>         |
| TU38             | <i>deg-1(u38) X</i>                 |
| VS8              | <i>dhs-28(hj8) X</i>                |
| KP715            | <i>eos-1(nu288) IV</i>              |
| CX6448           | <i>gcy-35(ok769) I</i>              |
| AX1297           | <i>gcy-36(db66) X</i>               |
| HA865            | <i>grk-2(rt97) III</i>              |
| CX3937           | <i>lim-4(ky403) X</i>               |
| VS18             | <i>maoc-1(hj13) II</i>              |
| MT8944           | <i>mod-5(n822) I</i>                |
| MT9772           | <i>mod-5(n3314) I</i>               |
| CX4544           | <i>ocr-2(ak47) IV</i>               |
| CX2065           | <i>odr-1(n1936) X</i>               |
| CX2304           | <i>odr-2(n2145) V</i>               |
| CX2205           | <i>odr-3(n2150) V</i>               |
| MT5300           | <i>odr-4(n2144) III</i>             |
| PR808            | <i>osm-1(p808) X</i>                |
| MT3641           | <i>osm-10(n1602) III</i>            |
| PR802            | <i>osm-3(p802) IV</i>               |
| PR811            | <i>osm-6(p811) V</i>                |
| CX10             | <i>osm-9(ky10) IV</i>               |
| NA404            | <i>him-8(e1489) qui-1(gb404) IV</i> |
| WWZ165           | <i>srbc-64(tm1946) I</i>            |
| WWZ164           | <i>srbc-66(tm2943) V</i>            |
| CC1              | <i>srg-36 srg-37 X</i>              |
| PR691            | <i>tax-2(p691) I</i>                |
| PR694            | <i>tax-2(p694) I</i>                |
| PR678            | <i>tax-4(p678) III</i>              |
| MT15434          | <i>tph-1(mg280) II</i>              |
| MT14984          | <i>tph-1(n4622) II</i>              |
| PY1133           | <i>unc-130(oy10) II</i>             |
| CB156            | <i>unc-25(e156) III</i>             |
| MT6214           | <i>unc-25(n2569) III</i>            |
| CB151            | <i>unc-3(e151) X</i>                |
| CB307            | <i>unc-47(e307) III</i>             |
| MT6201           | <i>unc-47(n2409) III</i>            |

|                                |                                                                                    |
|--------------------------------|------------------------------------------------------------------------------------|
| WWZ221                         | <i>tax-4(p678); cazEx20[Pstr-3::tax-4+Pmyo-2::Dsred]</i>                           |
| WWZ225                         | <i>tax-4(p678); cazEx21[Psrg-8::tax-4+Pmyo-2::Dsred]</i>                           |
| WWZ226                         | <i>tax-4(p678); cazEx22[Psra-13::tax-4+Pmyo-2::Dsred]</i>                          |
| PY7513                         | <i>tax-4(p678); Ex[ceh-36delp::tax-4,unc-122p::dsred]</i>                          |
| PY7515                         | <i>tax-4(p678); Ex[srbc-65p::tax-4,unc-122p::dsred]</i>                            |
| PY7502                         | <i>oyIs85 [ceh-36p::TU#813 + ceh-36p::TU#814 + srtx-1p::GFP + unc-122p::dsRed]</i> |
| PY7505                         | <i>oyIs84 [gpa-4p::TU#813 + gcy-27p::TU#814 + gcy-27p::GFP + unc-122p::dsRed].</i> |
| N2                             | WT                                                                                 |
| <i>Steinernema carpocapsae</i> | WT                                                                                 |

---
